# Supplementary material for: Integrative Transcriptomics Data Mining to Explore the Functions of TDP1α and TDP1β Genes in the Arabidopsis thaliana Model Plant
Source: MDPI journal article supplement (doi:10.3390/genes14040884), 2023-04-09
Supplement: s1 [file s1]

# **Integrative Transcriptomics Data Mining to Explore the Functions of *TDP1 $\alpha$* and *TDP1 $\beta$* Genes in the *Arabidopsis thaliana* Model Plant**

**Paola Pagano, Andrea Pagano, Stefano Paternolli, Alma Balestrazzi and Anca Macovei \***

Department of Biology and Biotechnology “L. Spallanzani”, University of Pavia,  
27100 Pavia, Italy

\* Correspondence: [anca.macovei@unipv.it](mailto:anca.macovei@unipv.it)

```

AT5G15170 -----MAHSQVAYLIPLKADLKEDNSSPRITLSEGPNIIGRG-----NVSIVDKRL
AT5G07400 MKRRQCEKVVIRIHNIQTPLISGSSGLPLELFHIQSDRPYYTIGRSSSDGFCDFVIDHSSI
          :.          ** :. . .          * : * ** :. : * . :

AT5G15170 SRKHITIIIVSTSGSASLSVDGTPVIRSS-----GD
AT5G07400 SRKHCQILFDSQSHKLYIFDGVHLPSSGSFSQVYDEFRRRLVGVEDLGNLKFASLNGVY
          **** * :. :. . .          . ** : *

AT5G15170 GERKKVKPSEEVSVCNDDLIELIPG-----
AT5G07400 VNRVVRVKSKVQEVSIDDEVLFFCGKEGLCKDGRVGFVVQEIVFEGRDASIVSVSSGHS
          : * : * : * : . * . * : : *

AT5G15170 -----
AT5G07400 RGTFSGSKRSKRVFAPMENEINSPVSGFYPPKAVGVVERVNSLVSYCRHILKSDDPLSCL

AT5G15170 -----
AT5G07400 RLSIIHSGKECLSCCTSKMFRSKVGIVADDRGVKSAEINHDMGHGLSGLRLSIERPNSN

AT5G15170 -----HHFFKLVLNLNGRAAKKARKAEDDVEAIRRFCPPNEK-----
AT5G07400 LHVDRRLGVSDLISEIENEFAACTFISDKTRTMLPFDGEKVNTPDITCINKEKSYQSSLQ
          : . * : . : . : . : . : * : * : **

AT5G15170 LPSTFRLLSVDALPDWANTSCVSIINDVIEG----DVVAAILSNYMVDIDWLSACPKLA
AT5G07400 APGNFYLNRLQYIEQSSSTGCQRVSLPELLHPVESIQQIFLATFTSDILWFLTCCDTPR
          * . . * . : : * . * : : * : : * : * : * : .

AT5G15170 NIPQVMVIHGE-----DGRQEYIQRKKPANWILHKPR-LPISFG-----THHS
AT5G07400 HLPVTIACHNAERCWSSNPDPARTAVPLPNYPNVTMVYPFFEEIAFGKDRTNRGIACHHP
          : * : . . * . * : * : : * : * : * : * :

AT5G15170 KAIFLVYPRGVVVVHTANLIHVDWNNKSQGLWMQDFPWKDDDKDPPKGCGFEGDLIDYL
AT5G07400 KLFLQRKDSIRVIITSANLVARQWNDVTNTVWWQDFPRRAD----PDLLSLFGHCQRET
          * : : * : : * : : * : : * : : * : * : * : . : * .

AT5G15170 NVLKWPEFTANLPGRGNVKIN-----AAFFKKFDYSDATVRLIASVPGYHTG-----
AT5G07400 NHGLKPDFCAQLAGFAASLLTDVPSQAHWILEFTKYNFEHSAGHLVASVPGIHSYKPSYL
          * : * : * : * : . : . : * : : : : : * : * : * : * :

AT5G15170 -----
AT5G07400 TESGCSNTIFSEEFLGSVEASVGLSYLFRSANDSTGAQLKRLASYIRRTRENSLGMLEL

AT5G15170 -----FNLNKWGH
AT5G07400 VLRRTNVPADPNVAVRLVVPNPDDDSRDDVFQLGFLPRSIAKWVSPLWDIGFFKFVGYVY
          * : : : :

AT5G15170 MKLRTILQECIFDREFRRSPLIYQFSSLSGLDEKWLAIEFGNSLSSGITEDKTPLGPG---
AT5G07400 RDEVLGAASCRSNEKVQLVLHVLQGVSISDMSKLIQPYHVVALCSLIASLQRCGTGIWRLQ
          . * : : : : : * * : : : : . . : * : * : : *

AT5G15170 --DSLIIWPTVEDVRCSLEGYAAGNAIPS-----
AT5G07400 EVLGRYKWPESQESDFVYSASSIGGSATTGFQADFSSAAGKALQHFDSESDPEWGCWS
          . * * : : . : * : : :

AT5G15170 -----PLKNVEKP-----FLKKYWARWKAD-----
AT5G07400 NREEREAPSIKIIPTIERVKNGHHGVLSSRRLLCFSEKTWQWRHSNVLHDAVNPQDR
          * : : * * : : * : * : * : * :

AT5G15170 --HSARGRAMPHIKTFTRYN-DQKIAWFLLTSSNLSKAAWGALQKNNSQ-----
AT5G07400 VGHPMHIKVARRLFTSTRGSRSSSFGWVYSGSHNFSAAAWGQTISRSSRNNQDSNNAIR
          * . : . : : * * * . . : . : * . * : * * * . . : * :

AT5G15170 ----LMIRSYELGVFLPSP-----IKTQGCVFSCTESNPVSMKAKQETKDEVEK
AT5G07400 AVKLRVRCNYELGIVFVPPPHEETDSCGSKIDDIVLPFVVPAPKYGWSDKPATGLAMR
          * : . * * * : * : . * : . . . * . : : . . :

AT5G15170 RSKLVTMTWQGDRLPEIISLPVPYQLPPKPYSPEDVPWSWDRGYSKKDVYGVWPR---
AT5G07400 EAFAEFREGSTSCFGESEVEEEEEEEEADEGRGEFVAEEEKQEEEAALWSQVE
          . : . . . * : : : : : : : : : : * : .

AT5G15170 -----
AT5G07400 SSSSSLS

```

**Supplementary Figure S1.** Protein alignment between TDP1 $\alpha$  (AT5G15170) and TDP1 $\beta$  (AT5G07400) carried out with ClustalW tool. Main protein domains are evidenced as follows, the FHA (Fork-associated domain) in blue, the two HKD catalytic domains, structured as

aHxK(x)4D(x)6GSxN sequence, in green, and the HIRAN domain, present only in the TDP1 $\beta$  sequence, in dark red. The sequence similarity calculations indicate 123 aa conserved indicating relatively 11% similarity between the two protein sequences.

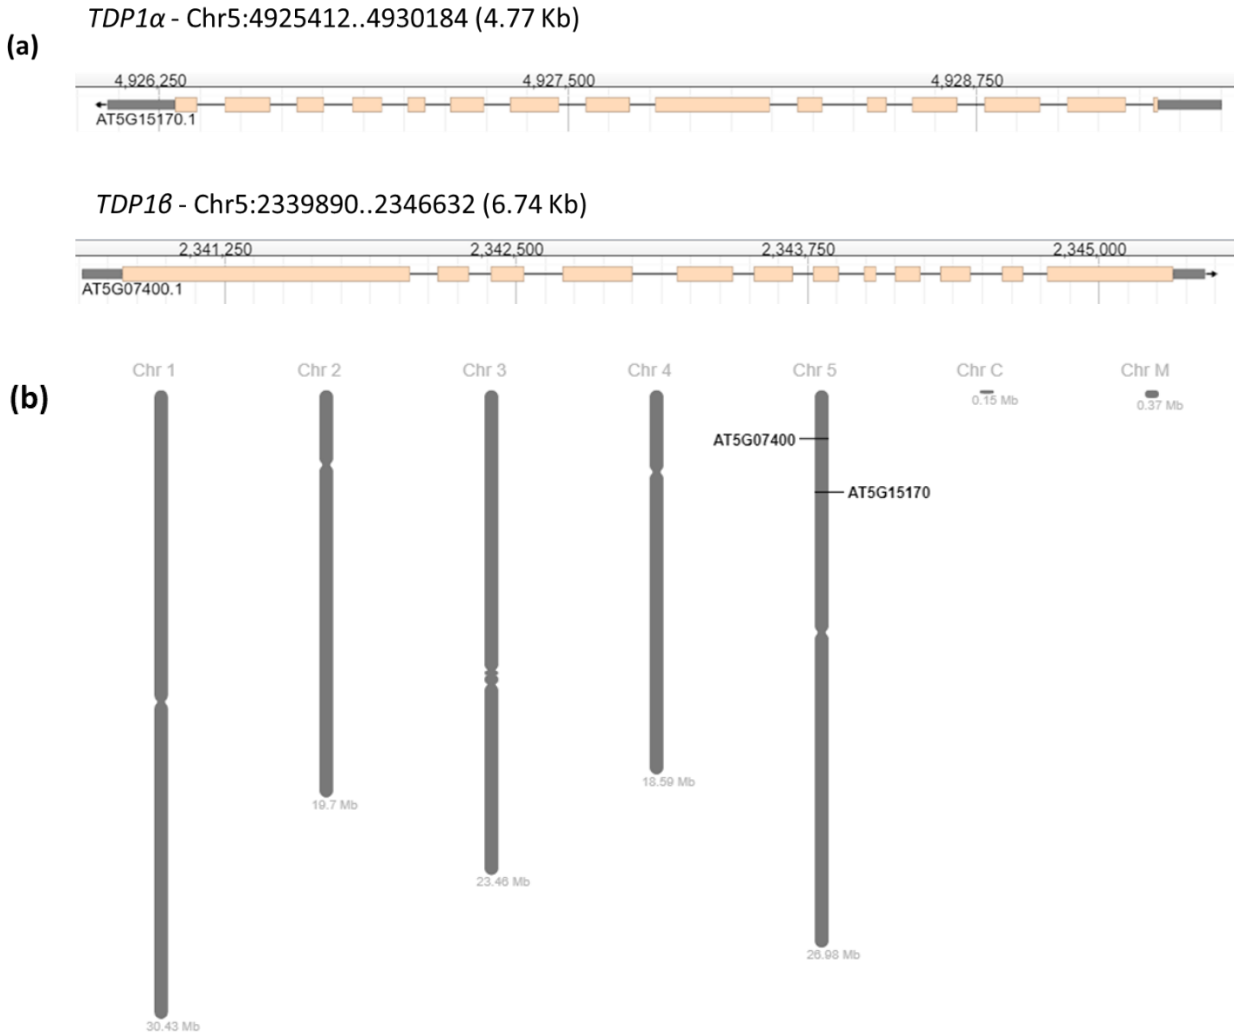

**Supplementary Figure S2.** *Arabidopsis thaliana* *TDP1 $\alpha$*  (AT5G15170) and *TDP1 $\beta$*  (AT5G07400) gene organization (a) and chromosomal localization (b).

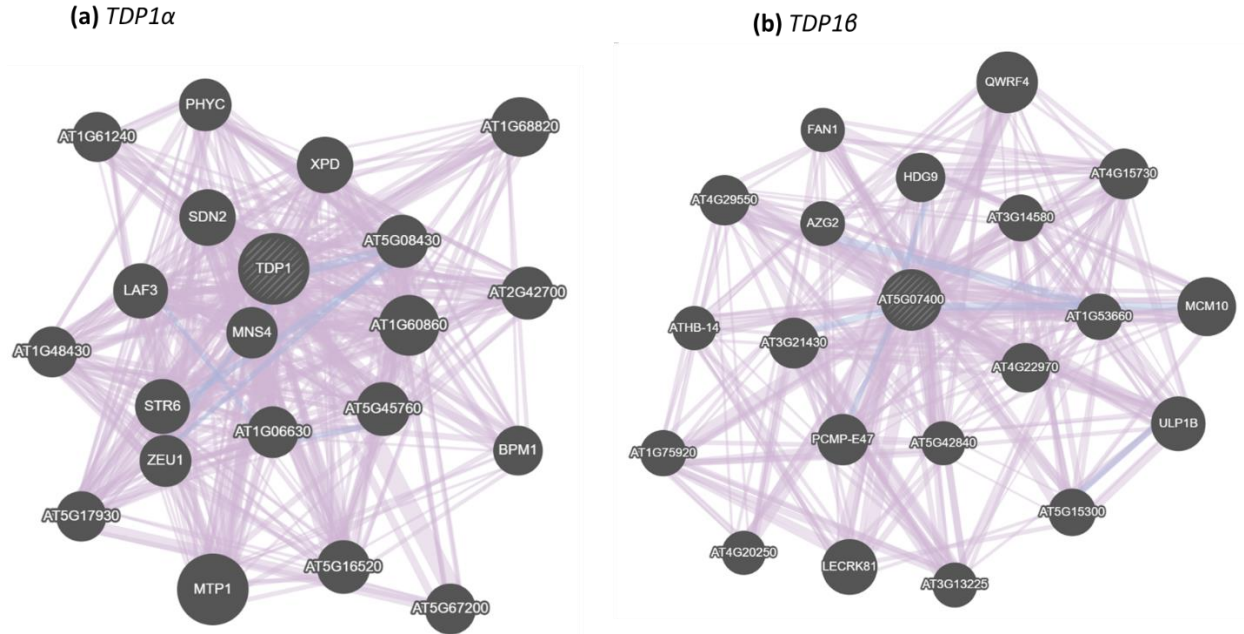

**Supplementary Figure S3.** *Arabidopsis thaliana* *TDP1α* and *TDP1β* gene co-expression and colocalization networks generated using GeneMania (<https://genemania.org/>). Co-expression with other genes are given with violet lines while co-localization data is shown with blue lines. (a) *TDP1α* co-expressed genes brief description: *AT1G61240*, lysine ketoglutarate reductase trans-splicing-like protein (DUF707), involved in temperature-dependent root growth; *AT1G68820*, PPRT1, putative C3HC4 zinc-finger ubiquitin E3 ligase, negative regulator in ABA and drought stress response; *AT1G48430*, dihydroxyacetone kinase, required for glycerolipid metabolism and for the activation of systemic acquired resistance; *AT5G08430*, SWIB/MDM2 and Plus-3 and GYF domain-containing protein, involved in plant-pathogen interactions; *AT1G60860*, AGD2, VAN3-LIKE PROTEIN2 involved in plant defense and senescence; *AT1G42700*, hypothetical protein, unknown function; *AT1G06630*, F-box/RNI-like superfamily protein involved in cell division and during the transition from skotomorphogenesis to photomorphogenesis; *AT5G45760*, transducin/WD40 repeat-like superfamily protein, involved in chromatin assembly; *AT5G17930*, MIF4G domain-containing protein/MA3 domain-containing protein; *AT5G16520*, transmembrane protein; *AT5G67200*, leucine-rich repeat protein kinase family protein; *PHYC*, PHYTOCHROME C family of photoreceptors that modulate plant growth and development; *XPD/UVH6*, general transcription and DNA repair factor IIIH helicase subunit XPD *Xeroderma pigmentosum*, role in response to light and DNA damage/repair; *SDN2*, small RNA degrading nuclease 2; *LAF3*, protein LONG AFTER FAR-RED 3, required for phyA-controlled responses to continuous far-red light (FRc) conditions, including the inhibition of hypocotyl elongation; *MNS4*, MANNOSIDASE 4, glycosyl hydrolase family 47 protein involved in the degradation of misfolded variants of the heavily glycosylated brassinosteroid receptor, BRASSINOSTEROID INSENSITIVE1; *STR6*, rhodanese-like domain-containing protein 6 involved in signaling processes as sulfur carriers, required for anchoring ferredoxin-NADP reductase to the thylakoid membranes and sustaining efficient linear electron flow (LEF); *ZEUI*, thymidine kinase 1, involved in tolerance to genotoxic stress; *BPM1*, encodes a member

of the MATH-BTB domain proteins that directly interact with and target for proteasomal degradation the class I homeobox-leucine zipper (HD-ZIP) transcription factor ATHB6; *MTP1*, metal tolerance protein 1, mediates zinc accumulation in roots and confers resistance to zinc. **(b)** *TDP1 $\beta$*  co-expressed genes brief description: *AT4G29550*, hypothetical protein (DUF626); *AT3G14580*, Pentatricopeptide repeat (PPR) superfamily protein, involved in biotic stress; *AT4G15730*, CW-type Zinc Finger; *AT3G21430*, EARLY 3, DNA binding protein; *AT1G53660*, nucleotide/sugar transporter family protein; *AT4G75920*, secE/sec61-gamma protein transport protein; *AT1G75920*, EXL5, GDSL-motif esterase/acyltransferase/lipase; *AT5G42840*, Cysteine/Histidine-rich C1 domain family protein, involved in plant defense response; *AT4G20250*, hypothetical protein; *AT3G13225*, WW domain-containing protein involved in viral defense; *AT5G15300*, PPR superfamily protein; *FAN1*, nuclease involved in DNA crosslink repair; *HDG9*, HOMEODOMAIN GLABROUS 9, encodes a homeobox-leucine zipper family protein belonging to the HD-ZIP IV family; *HDG2*, homeodomain GLABROUS 2; *ATHB-14*, homeobox-leucine zipper protein ATHB-14; *QWRF4*, QWRF motif-containing protein 4; *AZG2*, adenine/guanine permease involved in the transport of purines; *MCM10*, MINICHROMOSOME MAINTENANCE 10, involved in the initiation of DNA replication; *PCMP-E47*, PPR superfamily protein; *ULP1B*, UB-like protease 1B involved in biotic stress; *LECRK81*, L-TYPE LECTIN RECEPTOR KINASE II.1, involved in plant insect defense.

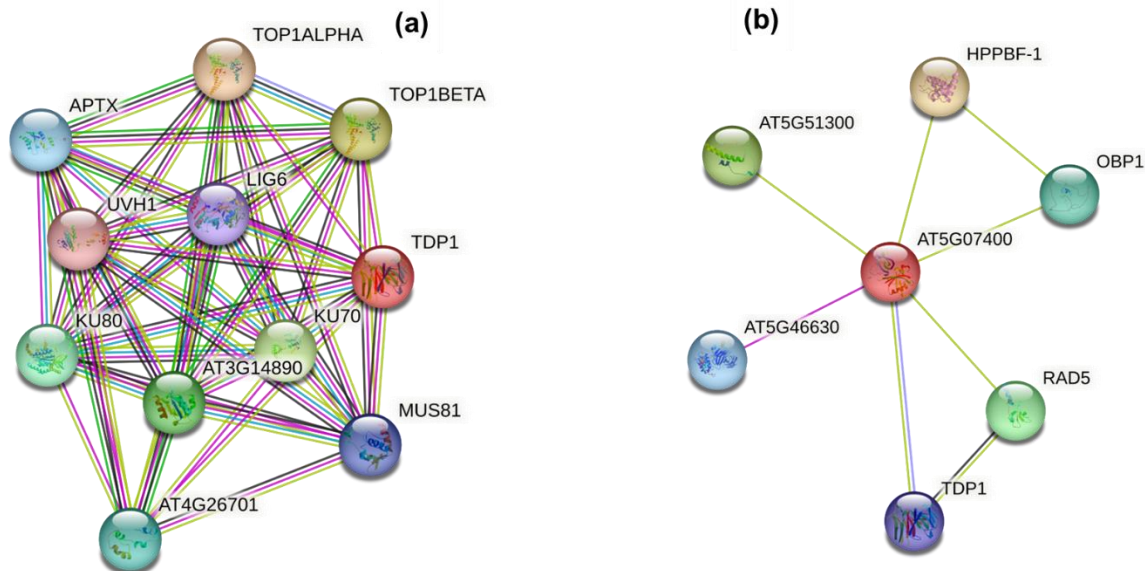

**Supplementary Figure S4.** Predicted protein-protein interaction networks for *Arabidopsis thaliana* TDP1 $\alpha$  and TDP1 $\beta$  sequences generated using STRING (<https://string-db.org/>). Line color legend: turquoise, data from curated databases; viola, experimentally determined; green, gene neighborhood; red, gene fusion; dark blue, gene co-occurrence; brown, text-mining; black, co-expression; light blue, protein homology. **(a)** TDP1 $\alpha$  predicted interactors: AT3G14890, bifunctional polynucleotide phosphatase/kinase; Polynucleotide 3'-phosphatase ZDP; Nick-sensing 3'-phosphoesterase involved in a base excision repair pathway required for active DNA

demethylation; AT4G26701, DNA binding, DNA topoisomerase type I, involved in DNA topological change, DNA unwinding involved in replication; TOP1ALPHA, DNA topoisomerase I alpha, releases the supercoiling and torsional tension of DNA introduced during the DNA replication and transcription by transiently cleaving and rejoining one strand of the DNA duplex; TOP1BETA, DNA topoisomerase I beta; APTX, APRATAXIN-LIKE, transcription factor bHLH140 with adenylyl sulfate sulfohydrolase activity; UVH1, restriction endonuclease, type II-like superfamily protein, involved in NER, the repair of UV light, and oxidative damage; LIG6, DNA ligase 6, seals nicks in dsDNA during DNA replication, DNA recombination and DNA repair, required to maintain seed viability and during seed germination; KU70, ATP-dependent DNA helicase 2 subunit KU70, ssDNA-dependent ATP-dependent helicase, involved in NHEJ required for DSB repair; KU80, ATP-dependent DNA helicase 2 subunit KU80, forms a heterodimer with KU70, the KU70/80 complex, required for proper maintenance of the telomeric C strand; MUS81, restriction endonuclease, type II-like superfamily protein involved in DPC repair in independent pathways to WSS1A and TDP1. **(b)** TDP1 $\beta$  predicted interactors: AT5G51300, splicing factor-like protein, required for the splicing of pre-mRNA during plant development and in response to ABA; AT5G46630, clathrin adaptor complexes AP-2 medium subunit family protein, functions in protein transport via transport vesicles in different membrane traffic pathways; HPPBF-1, telomere repeat-binding protein 4, it binds specifically to the plant telomeric dsDNA sequences 5'-TTTAGGG-3'; OBP1, Dof zinc finger protein DOF3.4, transcription factor that binds specifically to a 5'-AA[AG]G-3' consensus core sequence and enhances the DNA binding of OBF transcription factors to OCS elements; RAD5, DNA repair protein RAD5A, functions in error-free post-replication DNA repair or DNA-damage tolerance (DTT) pathway, required for HR-induced by DSBs; TDP1, tyrosyl-DNA phosphodiesterase-like protein, DNA repair enzyme that catalyzes the hydrolysis of dead-end complexes between DNA and the topoisomerase I active site tyrosine residue.

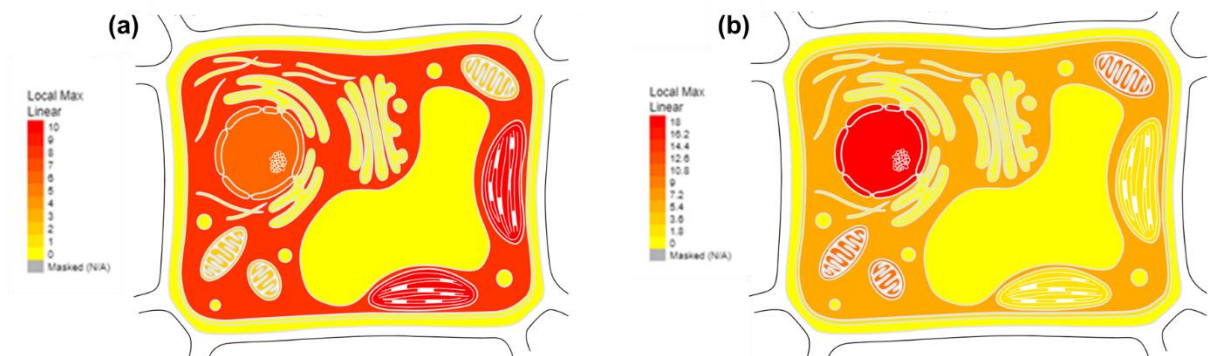

**Supplementary Figure S5.** Computationally predicted and experimentally documented subcellular localization of the *Arabidopsis thaliana* TDP1 $\alpha$  **(a)** and TDP1 $\beta$  **(b)** proteins as obtained from ePlant (<http://bar.utoronto.ca/eplant>). The higher the confidence score for a given subcellular compartment, the more intense the red color in the Cell eFP Browser output.
